# Supplementary material
Source: publisher figshare collection journal article supplement (https://sage.figshare.com/ndownloader/files/15254423)
Supplement: Supplementary file 1 [file 15254423]

**Continuous electro-encephalographic (EEG) monitoring in the Intensive Care Unit:**

**A survey of Intensive Care Units Worldwide**

**SECTION I - DEMOGRAPHICS**

- 1. Name of Hospital and Healthcare System** (for demographic use only – will not be published):

- 2. Location: City, State (if applicable), Country** (for demographic use only – will not be published):

- 3. Type of ICU (1)**

- ☐ Medical
- ☐ Surgical
- ☐ Neurological/neurosurgical
- ☐ Cardiac Surgery/Cardiac Care
- ☐ Trauma
- ☐ Pediatric
- ☐ Burns
- ☐ Multidisciplinary
- ☐ Other, specify \_\_\_\_\_

- 4. Characteristics of your institution (Per Halpern et al criteria)**

- ☐ Community, non-academic
- ☐ Academic, university based
- ☐ Public
- ☐ Military, or VA
- Other, specify \_\_\_\_\_

- 5. Size of the hospital based on number of total beds at your institution (Per Halpern et al criteria)(2)**

- ☐ Small to medium (<300)
- ☐ Large (301-500)

- ☐ Extra-large (>500 beds)
- 

**6. Size or total beds at your ICU (Per Halpern et al criteria)(3)**

- ☐  $\leq 12$   
☐ 13-18  
☐ 19-24  
☐  $\geq 25$

**SECTION II – cEEG NEUROMONITORING TEAM**

**For the following questions, cEEG refers to EEG with and without video monitoring.**

**7. Is there a cEEG team on site at your institution?(4)**

- ☐ Yes  
☐ No  
☐ Don't know
- 

**8. Is the cEEG team at your institution supervised by a "Team-leader(s)" ? (i.e. physician(s) with training and experience in clinical EEG)(4)**

- ☐ Yes  
☐ No  
☐ Don't know
- 

**9. Please identify the typical designation of the cEEG "Team-Leader(s)"**

- ☐ Neurologist  
☐ Certification in clinical neurophysiology (American Board of Psychiatry

and Neurology [ABPN] or American Board of Clinical Neurophysiology [ABCN])

- ☐ Fellowship trained (i.e at least 1-year of post-residency training in clinical neurophysiology with a 6-month concentration in EEG and at least 3-months of cEEG )
  - ☐ Certification in epilepsy (ABPN, sub-epilepsy) (i.e. at least 1-year post-residency training in clinical neurophysiology or epilepsy)
  - ☐ Neuro-Intensivist
    - ☐ Certification in neurocritical care (UCNS) (i.e. at least 6 months post-residency full time training in EEG and at least 3 months of cEEG)
  - ☐ Other, specify
- 

**10. How many “Team-leaders” at your institution?**

- ☐ 1-2
- ☐ 3-4
- ☐  $\geq 5$
- ☐ Don't know

**11. Can the cEEG Team Leader(s) access cEEG's in your ICU remotely ?(4)**

- ☐ Yes
  - ☐ No
  - ☐ Don't know
- 

**12. Does the cEEG team also rely on “Team leader(s) designees to interpret cEEG in your ICU?**

- ☐ Yes
- ☐ No

☐ Don't know

---

**13. What type of designee(s)?**

- ☐ Neurodiagnostic Technologists (NDT)
  - ☐ Residents, house-staff
  - ☐ Fellows
  - ☐ Other, specify
  - ☐ Don't know
- 

**14. Are there on site Neurodiagnostic Technologists (NDT) at your institution?(4)**

- ☐ Yes
  - ☐ No
  - ☐ Don't know
- 

**15. What is the availability of your Neurodiagnostic Technologists (NDT) at your institution?(4, 5)**

- ☐ In-house 24-hours a day
  - ☐ In-house part of the day with no overnight coverage
  - ☐ In-house part of the day and off-site (on call)
  - ☐ Off-site (on call)
  - ☐ Don't know
- 

**16. How many Neurodiagnostic Technologists (NDT) at your institution?**

- ☐ 1-2
  - ☐ 3-4
  - ☐  $\geq 5$
  - ☐ Don't know
- 

**17. If there is no onsite cEEG team at your institution, do you outsource?(4)**

- ☐ Yes
- ☐ No
- ☐ Don't know

**SECTION III – INDICATIONS**

**18. Please select all the indications for you which normally request cEEG in the ICU at your institution (Check ALL that apply) (4, 6)**

- ☐ Diagnosis of non-convulsive seizures, non-convulsive status epilepticus, and other hyperkinetic paroxysmal events
- ☐ Assessment of efficacy of therapy for seizures and status epilepticus (convulsive and non-convulsive)
- ☐ Monitoring of sedation and high-dose suppressive therapy (sedative and anesthetic infusion)
- ☐ Assessment and severity of encephalopathy and prognostication
- ☐ Identification of cerebral ischemia
- ☐ Subarachnoid hemorrhage
- ☐ Brain injury with subsequent coma
- ☐ Research
- ☐ Other: Please specify:

**SECTION IV – cEEG PROCEDURES**

**19. Does your institution/ICU have an established protocol to request cEEG based on indications, urgency, and duration of cEEG?(4)**

- ☐ Yes
  - ☐ No
  - ☐ Don't know
- 

**20. Under ideal conditions, cEEG should be available 24 hours a day, seven days per week, with electrodes applied and EEG recorded by NTDs, with rapid interpretation by a "Team-leader".**

**Is this the case at your institution? (4)**

- ☐ Yes
  - ☐ No
  - ☐ Don't know
- 

**21. How frequent is the cEEG report provided to the ICU team at your institution?(1, 4)**

- ☐ Once a week
  - ☐ Once every 48-72 hours
  - ☐ Once a day
  - ☐ Twice a day
  - ☐ Continuous monitoring with real time updates as requested
  - ☐ Never or upon patient's discharge from ICU
  - ☐ Other, specify
  - ☐ Don't know
- 

**22. How are reports delivered to the ICU team? (1, 4)**

- ☐ Hand written report in the hospital chart
- ☐ Electronic report entered into an electronic medical record (EMR)

- ☐ Report is verbally communicated to ICU team
  - ☐ Report is communicated to ICU team by SMS text or e-mail
  - ☐ Other, specify
  - ☐ Don't know
- 

**23. How often is there a change in clinical management based on the cEEG results?**

- ☐ Never
  - ☐ Rarely
  - ☐ Sometimes
  - ☐ Frequently
- 

**24. During cEEG monitoring in your ICU, do you have Video recording capability? (4)**

- ☐ Yes
  - ☐ No
  - ☐ Don't know
- 

**25. During cEEG monitoring in your ICU, do you have graphical display quantitative EEG (QEEG) capability? (4)**

- ☐ Yes
- ☐ No
- ☐ Don't know
